# Supplementary material
Source: publisher site journal article supplement (https://www.dovepress.com/article/478246)
Supplement: Supplementary file 1 [file get_supplementary_file.php]

**Assessing emotion regulation difficulties across negative and positive emotions: psychometric properties and clinical applications of** **the Perth Emotion Regulation Competency Inventory in the Chinese context**

**Supplementary materials**

1. **Supplementary Table S1 –** Full list of lie/attention detection question pairs.

2. **Supplementary Table S2 –** English version andChinese version of the PERCI.

3. **Supplementary Table S3 –** Goodness-of-fit index values from Confirmatory factor analysis using lavaan in R.

4. **Supplementary Table S4 –** Stepwise multiple regression of the BDI score on demographic factors and the PERCI to the ERQ and DERS.

5. **Supplementary Table S5 –**MANCOVA results of the PERCI subscales and composite scores.

6. **Supplementary Table S6 –** Correlations between total scores of the HAMD and the PERCI in MDD group.

7. **Supplementary Figure S1 –** Graphical representations of all factor structures conducted in confirmatory factor analyses.

**Supplementary Table S1 –** Full list of lie/attention detection question pairs.

| 1 | 1. 我和大家一样，是一个普通的人。 | 1. I am an ordinary person, just like others. |
| --- | --- | --- |
| 1. 我是一个非常古怪的，不同寻常的人。 | 1. I am a very peculiar and unconventional individual. |
|  | | |
| 2 | 1. 拥有一个知心好友对我而言非常重要。 | 1. Having a close friend is extremely important to me. |
| 1. 我认为有无亲密朋友不重要。 | 1. I believe that having or not having intimate friends is not important. |
|  | | |
| 3 | 1. 和朋友在一起时我没有戒心。 | 1. I am not guarded when I am with friends. |
| 1. 即使与朋友在一起时我也心存戒备。 | 1. Even when I am with friends, I remain cautious. |
|  | | |
| 4 | 1. 相比起独处，我更喜欢和大家待在一起。 | 1. I prefer being with others rather than being alone. |
| 1. 我宁愿独处。 | 1. I prefer being alone. |
|  | | |
| 5 | 1. 我很想了解别人。 | 1. I am very interested in getting to know others. |
| 1. 我对了解别人不感兴趣。 | 1. I am not interested in getting to know others. |
|  | | |
| 6 | 1. 在一些需要和别人正式交谈的场合，我一般不会感到非常紧张。 | 1. In formal conversations with others, I generally do not feel very nervous. |
| 1. 当必须与别人进行正式交谈时，我感到非常紧张。 | 1. I feel very nervous when I have to engage in formal conversations with others. |
|  | | |
| 7 | 1. 与陌生人见面时我通常不会紧张。 | 1. I usually do not feel nervous when meeting strangers. |
| 1. 与人第一次相见时我会觉得紧张。 | 1. I feel nervous when meeting someone for the first time. |
|  | | |
| 8 | 1. 我很喜欢笑。 | 1. I enjoy laughing. |
| 1. 我很少大笑或微笑。 | 1. I rarely laugh or smile. |
|  | | |
| 9 | 1. 与别人在一起时，大多数时间我都不说话。 | 1. When I am with others, I seldom talk. |
| 1. 与别人在一起时，我很喜欢说话。 | 1. I talk a lot when I am with others. |
|  | | |
| 10 | 1. 在一群陌生人当中我也不会紧张。 | 1. Even among a group of strangers, I do not feel nervous. |
| 1. 当处在一群不熟悉的人中，你是否常觉得紧张？ | 1. Do you often feel nervous when in a group of unfamiliar people? |

*Note:* Those who provided more than three inconsistent answers may not respond carefully and were excluded from the analysis. A total of 352 participants were excluded.

**Supplementary Table S2 –** Chinese version of the PERCI.

**珀斯情绪调节能力量表**

**Name/姓名： Date/日期：**

This questionnaire asks about how you manage and respond to your emotions. Please score the following statements according to how much you agree or disagree that the statement is true of you. Circle one answer for each statement. The first half of the questionnaire asks about bad or unpleasant emotions, this means emotions like sadness, anger, or fear. The second half asks about good or pleasant emotions, this means emotions like happiness, amusement, or excitement.

该问卷旨在了解你如何处理与应对自己的情绪。请评估下列描述与你的真实情况是否符合，判断你在多大程度上同意或是不同意这些描述，并在对应选项上画圈。该问卷的前半部分关注的是负性的或不愉快的情绪，如悲伤、愤怒或恐惧。问卷的后半部分则关注的是正性的或愉快的情绪，如快乐、喜悦或激动。

|  |  | Totally disagree非常不同意 | ---- | ---- | Neutral  中立 | ---- | ---- | Totally agree  非常同意 |
| --- | --- | --- | --- | --- | --- | --- | --- | --- |
| 1 | When I'm feeling bad (feeling an unpleasant emotion), I don't know what to do to feel better.  当我感觉糟糕时（感受到不愉快的情绪时），我不知道该做些什么来使自己好受些。 | 1 | 2 | 3 | 4 | 5 | 6 | 7 |
| 2 | When I'm feeling bad, those feelings stop me from getting work done.  当我感觉糟糕时，这些感受使我难以完成工作。 | 1 | 2 | 3 | 4 | 5 | 6 | 7 |
| 3 | When I'm feeling bad, I do stupid things.  当我感觉糟糕时，我会做些愚蠢的事。 | 1 | 2 | 3 | 4 | 5 | 6 | 7 |
| 4 | When I'm feeling bad, I believe I need to get rid of those feelings at all costs.  当我感觉糟糕时，我认为我需要不惜一切代价来摆脱这些感受。 | 1 | 2 | 3 | 4 | 5 | 6 | 7 |
| 5 | When I'm feeling bad, I'm powerless to change how I'm feeling.  当我感觉糟糕时，我无力改变自己的感受。 | 1 | 2 | 3 | 4 | 5 | 6 | 7 |
| 6 | When I'm feeling bad, I can't complete tasks that I'm meant to be doing.  当我感觉糟糕时，我无法完成我该要完成的任务。 | 1 | 2 | 3 | 4 | 5 | 6 | 7 |
| 7 | When I'm feeling bad, my behaviour becomes out of control.  当我感觉糟糕时，我的行为会变得失控。 | 1 | 2 | 3 | 4 | 5 | 6 | 7 |
| 8 | When I'm feeling bad, I can't allow those feelings to be there.  当我感觉糟糕时，我无法忍受这些感受的存在。 | 1 | 2 | 3 | 4 | 5 | 6 | 7 |
| 9 | When I'm feeling bad, I don't have many strategies (e.g., activities or techniques) to help get rid of that feeling.  当我感觉糟糕时，我没有太多方法（如某种活动活技巧）来帮助自己摆脱这些感受。 | 1 | 2 | 3 | 4 | 5 | 6 | 7 |
| 10 | When I'm feeling bad, I can't get motivated to do important things (work, chores, school etc.).  当我感觉糟糕时，我没有动力去做重要的事情（工作、家务、上学等）。 | 1 | 2 | 3 | 4 | 5 | 6 | 7 |
| 11 | When I'm feeling bad, I have trouble controlling my actions.  当我感觉糟糕时，我难以控制自己的行为。 | 1 | 2 | 3 | 4 | 5 | 6 | 7 |
| 12 | When I'm feeling bad, I must try to totally eliminate those feelings.  当我感觉糟糕时，我必须设法完全消除这些感受。 | 1 | 2 | 3 | 4 | 5 | 6 | 7 |
| 13 | When I'm feeling bad, I have no control over the strength and duration of that feeling.  当我感觉糟糕时，我无法控制这种感受的强度和持续时间。 | 1 | 2 | 3 | 4 | 5 | 6 | 7 |
| 14 | When I'm feeling bad, I have trouble getting anything done.  当我感觉糟糕时，我难以完成任何事情。 | 1 | 2 | 3 | 4 | 5 | 6 | 7 |
| 15 | When I'm feeling bad, I have strong urges to do risky things.  当我感觉糟糕时，我有强烈的冲动去做冒险的事。 | 1 | 2 | 3 | 4 | 5 | 6 | 7 |
| 16 | When I'm feeling bad, I believe those feelings are unacceptable.  当我感觉糟糕时，我认为这样的感受是无法接受的。 | 1 | 2 | 3 | 4 | 5 | 6 | 7 |
| 17 | When I'm feeling good (feeling a pleasant emotion), I do stupid things.  当我感觉好的时候（感受到愉快情绪时），我会做愚蠢的事。 | 1 | 2 | 3 | 4 | 5 | 6 | 7 |
| 18 | When I'm feeling good, I don't have many strategies (e.g., activities or techniques) to increase the strength of that feeling.  当我感觉好的时候，我没有太多方法（如某种活动活技巧）来提高这些感受的强度。 | 1 | 2 | 3 | 4 | 5 | 6 | 7 |
| 19 | When I'm feeling good, I have trouble completing tasks that I'm meant to be doing.  当我感觉好的时候，我无法完成我需要完成的任务。 | 1 | 2 | 3 | 4 | 5 | 6 | 7 |
| 20 | When I'm feeling good, part of me hates those feelings.  当我感觉好的时候，一部分的我会讨厌这些感觉。 | 1 | 2 | 3 | 4 | 5 | 6 | 7 |
| 21 | When I'm feeling good, my behaviour becomes out of control.  当我感觉好的时候，我的行为会变得失控。 | **1** | 2 | 3 | 4 | 5 | 6 | 7 |
| 22 | I don't know what to do to create pleasant feelings in myself.  我不知道该做什么来让自己有愉快的感受。 | 1 | 2 | 3 | 4 | 5 | 6 | 7 |
| 23 | When I'm feeling good, I end up neglecting my responsibilities (work, chores, school etc.).  当我感觉好的时候，我会因此忽视自己的责任（如工作、家务或上学等）。 | 1 | 2 | 3 | 4 | 5 | 6 | 7 |
| 24 | When I'm feeling good, I can't allow those feelings to be there.  当我感觉好的时候，我无法忍受这些感受的存在。 | 1 | 2 | 3 | 4 | 5 | 6 | 7 |
| 25 | When I'm feeling good, I have strong urges to do risky things.  当我感觉好的时候，我有强烈的冲动去做冒险的事。 | 1 | 2 | 3 | 4 | 5 | 6 | 7 |
| 26 | When I'm feeling good, I have no control over whether that feeling stays or goes.  当我感觉好的时候，我无法控制是让这些感受继续保持还是消失。 | 1 | 2 | 3 | 4 | 5 | 6 | 7 |
| 27 | When I'm feeling good, I have difficulty staying focused during important stuff (at work or school, etc.).  当我感觉好的时候，我难以保持专注于重要的事情上（工作或学习）。 | 1 | 2 | 3 | 4 | 5 | 6 | 7 |
| 28 | When I'm feeling good, I believe those feelings are unacceptable.  当我感觉好的时候，我认为这些感受的无法接受的。 | 1 | 2 | 3 | 4 | 5 | 6 | 7 |
| 29 | When I'm feeling good, I can't keep control over myself (in terms of my behaviours).  当我感觉好的时候，我无法控制我自己（在自己的行为方面）。 | **1** | 2 | 3 | 4 | 5 | 6 | 7 |
| 30 | When I'm feeling good, I don't have any useful ways to help myself keep feeling that way.  当我感觉好的时候，我没有任何有用的方法来帮助自己维持这种感觉。 | 1 | 2 | 3 | 4 | 5 | 6 | 7 |
| 31 | When I'm feeling good, I have trouble getting anything done.  当我感觉好的时候，我难以完成任何事情。 | 1 | 2 | 3 | 4 | 5 | 6 | 7 |
| 32 | When I'm feeling good, I must try to eliminate those feelings.  当我感觉好的时候，我必须设法摆脱这些感受。 | 1 | 2 | 3 | 4 | 5 | 6 | 7 |

**Supplementary Table S3.** Goodness-of-fit index values from Confirmatory factor analysis using lavaan in R.

| Model | ***χ*2 / df** | **RMSEA** | **SRMR** | **CFI** | **TLI** | **AIC** |
| --- | --- | --- | --- | --- | --- | --- |
| One-factor | 20.097 | 0.132 | 0.134 | 0.589 | 0.560 | 115758.862 |
| Two-factor | 9.598 | 0.089 | 0.083 | 0.815 | 0.802 | 110880.156 |
| Four-Factor | 17.501 | 0.123 | 0.149 | 0.649 | 0.620 | 114468.717 |
| **First-order eight-factor** | **4.870** | **0.060** | **0.054** | **0.922** | **0.911** | **108613.174** |
| Second-order eight-factor a | 5.691 | 0.066 | 0.079 | 0.901 | 0.892 | 109041.439 |
| Second-order eight-factor b | 8.986 | 0.086 | 0.135 | 0.831 | 0.816 | 110547.833 |
| Third-order eight-factor | 5.703 | 0.066 | 0.079 | 0.901 | 0.892 | 109043.439 |

*Note.* RMSEA, root mean square error of approximation; SRMR, standardized root mean residual; CFI, comparative fit index; TLI, Tucker Lewis index; AIC, Akaike information criterion.

**Supplementary Table S4 –** Stepwise multiple regression of the BDI score on demographic factors and the PERCI to the ERQ and DERS.

| Predictors added |  |  |  |  |
| --- | --- | --- | --- | --- |
|  | R2 | *Δ* R2 | *ΔF* | *p* |
| Age | 0.012 | 0.012 | 13.465 | **< 0.000***** |
| Gender | 0.022 | 0.010 | 10.809 | **0.001***** |
| Edu | 0.028 | 0.006 | 7.181 | **0.007**** |
| **ERQ** | 0.089 | 0.061 | 36.198 | **< 0.000***** |
| **DERS** | 0.377 | 0.287 | 82.763 | **< 0.000***** |
| **PERCI** |  |  |  | **< 0.000***** |
| P-Sub | 0.396 | 0.309 | 33.804 | **< 0.000***** |
| N-Sub | 0.400 | 0.005 | 8.654 | **0.003**** |
| N-Tol | 0.403 | 0.002 | 4.146 | **0.042*** |
| P-Tol | 0.405 | 0.002 | 4.157 | **0.042*** |

*Note.* BDI, Beck Depression Inventory; PERCI, Perth Emotion Regulation Competency inventory; ERQ, Emotion Regulation Questionnaire; DERS, Difficulties of Emotion Regulation Scale; P-Sub, Positive-Controlling experience; N-Sub, Negative-Controlling experience; N-Tol, Negative-Tolerating emotions; P-Tol, Positive-Tolerating emotions;

Significant *p* values were in bold.

* indicates *p* < 0.05. * indicates *p* < 0.01. *** indicates *p* < 0.001.

**Supplementary Table S5.** MANCOVA results of the PERCI subscales and composite scores.

|  | **MDD vs. HC** | | |
| --- | --- | --- | --- |
|  | ***F*** | ***p*** | ***η²*** |
| N-Sub | 34.93 | **< 0.000***** | 0.27 |
| N-Inh | 19.98 | **< 0.000***** | 0.17 |
| N-Act | 20.54 | **< 0.000***** | 0.18 |
| N-Tol | 21.83 | **< 0.000***** | 0.19 |
| P-Sub | 0.22 | 0.638 | 0.00 |
| P-Inh | 0.53 | 0.471 | 0.01 |
| P-Act | 0.07 | 0.795 | 0.00 |
| P-Tol | 0.08 | 0.777 | 0.00 |
| N-Com | 30.01 | **< 0.000***** | 0.24 |
| P-Com | 0.10 | 0.757 | 0.00 |

*Note.* MANCOVA, multivariate analysis of covariance;MDD, major depressive disorder; HC, healthy controls; PERCI, Perth Emotion Regulation Competency inventory; N-Sub, Negative-Controlling experience; N-Inh, Negative-Inhibiting behavior; N-Act, Negative-Activating behavior; N-Tol, Negative-Tolerating emotions; P-Sub, Positive-Controlling experience; P-Inh, Positive-Inhibiting behavior; P-Act, Positive-Activating behavior; P-Tol, Positive-Tolerating emotions; N-Com, composite score of negative valence; P-Com, composite score of positive valence.

*** indicates *p* < 0.001.

**Supplementary Table S6 –** Correlations between total scores of the HAMD and the PERCI in MDD group.

|  | HAMD | *p* |
| --- | --- | --- |
| Total score | 0.45 | **0.001** |
| N-Sub | 0.32 | **0.023** |
| N-Inh | 0.37 | **0.008** |
| N-Act | 0.37 | **0.008** |
| N-Tol | 0.34 | **0.015** |
| P-Sub | 0.30 | **0.032** |
| P-Inh | 0.31 | **0.030** |
| P-Act | 0.31 | **0.027** |
| P-Tol | 0.23 | 0.103 |
| N-Com | 0.38 | **0.006** |
| P-Com | 0.32 | **0.025** |

*Note.* PERCI, Perth Emotion Regulation Competency inventory; MDD, major depressive disorder; N-Sub, Negative-Controlling experience; N-Inh, Negative-Inhibiting behavior; N-Act, Negative-Activating behavior; N-Tol, Negative-Tolerating emotions; P-Sub, Positive-Controlling experience; P-Inh, Positive-Inhibiting behavior; P-Act, Positive-Activating behavior; P-Tol, Positive-Tolerating emotions; N-Com, composite score of negative valence; P-Com, composite score of positive valence.

Significant *p* values were in bold.

**Supplementary Table S7 –** English version of the PERCI.

|  |  | Totally disagree | ---- | ---- | Neutral | ---- | ---- | Totally agree |
| --- | --- | --- | --- | --- | --- | --- | --- | --- |
| 1 | When I'm feeling bad (feeling an unpleasant emotion), I don't know what to do to feel better. | 1 | 2 | 3 | 4 | 5 | 6 | 7 |
| 2 | When I'm feeling bad, those feelings stop me from getting work done. | 1 | 2 | 3 | 4 | 5 | 6 | 7 |
| 3 | When I'm feeling bad, I do stupid things. | 1 | 2 | 3 | 4 | 5 | 6 | 7 |
| 4 | When I'm feeling bad, I believe I need to get rid of those feelings at all costs. | 1 | 2 | 3 | 4 | 5 | 6 | 7 |
| 5 | When I'm feeling bad, I'm powerless to change how I'm feeling. | 1 | 2 | 3 | 4 | 5 | 6 | 7 |
| 6 | When I'm feeling bad, I can't complete tasks that I'm meant to be doing. | 1 | 2 | 3 | 4 | 5 | 6 | 7 |
| 7 | When I'm feeling bad, my behaviour becomes out of control. | 1 | 2 | 3 | 4 | 5 | 6 | 7 |
| 8 | When I'm feeling bad, I can't allow those feelings to be there. | 1 | 2 | 3 | 4 | 5 | 6 | 7 |
| 9 | When I'm feeling bad, I don't have many strategies (e.g., activities or techniques) to help get rid of that feeling. | 1 | 2 | 3 | 4 | 5 | 6 | 7 |
| 10 | When I'm feeling bad, I can't get motivated to do important things (work, chores, school etc.). | 1 | 2 | 3 | 4 | 5 | 6 | 7 |
| 11 | When I'm feeling bad, I have trouble controlling my actions. | 1 | 2 | 3 | 4 | 5 | 6 | 7 |
| 12 | When I'm feeling bad, I must try to totally eliminate those feelings. | 1 | 2 | 3 | 4 | 5 | 6 | 7 |
| 13 | When I'm feeling bad, I have no control over the strength and duration of that feeling. | 1 | 2 | 3 | 4 | 5 | 6 | 7 |
| 14 | When I'm feeling bad, I have trouble getting anything done. | 1 | 2 | 3 | 4 | 5 | 6 | 7 |
| 15 | When I'm feeling bad, I have strong urges to do risky things. | 1 | 2 | 3 | 4 | 5 | 6 | 7 |
| 16 | When I'm feeling bad, I believe those feelings are unacceptable. | 1 | 2 | 3 | 4 | 5 | 6 | 7 |
| 17 | When I'm feeling good (feeling a pleasant emotion), I do stupid things. | 1 | 2 | 3 | 4 | 5 | 6 | 7 |
| 18 | When I'm feeling good, I don't have many strategies (e.g., activities or techniques) to increase the strength of that feeling. | 1 | 2 | 3 | 4 | 5 | 6 | 7 |
| 19 | When I'm feeling good, I have trouble completing tasks that I'm meant to be doing. | 1 | 2 | 3 | 4 | 5 | 6 | 7 |
| 20 | When I'm feeling good, part of me hates those feelings. | 1 | 2 | 3 | 4 | 5 | 6 | 7 |
| 21 | When I'm feeling good, my behaviour becomes out of control. | **1** | 2 | 3 | 4 | 5 | 6 | 7 |
| 22 | I don't know what to do to create pleasant feelings in myself. | 1 | 2 | 3 | 4 | 5 | 6 | 7 |
| 23 | When I'm feeling good, I end up neglecting my responsibilities (work, chores, school etc.). | 1 | 2 | 3 | 4 | 5 | 6 | 7 |
| 24 | When I'm feeling good, I can't allow those feelings to be there. | 1 | 2 | 3 | 4 | 5 | 6 | 7 |
| 25 | When I'm feeling good, I have strong urges to do risky things. | 1 | 2 | 3 | 4 | 5 | 6 | 7 |
| 26 | When I'm feeling good, I have no control over whether that feeling stays or goes. | 1 | 2 | 3 | 4 | 5 | 6 | 7 |
| 27 | When I'm feeling good, I have difficulty staying focused during important stuff (at work or school, etc.). | 1 | 2 | 3 | 4 | 5 | 6 | 7 |
| 28 | When I'm feeling good, I believe those feelings are unacceptable. | 1 | 2 | 3 | 4 | 5 | 6 | 7 |
| 29 | When I'm feeling good, I can't keep control over myself (in terms of my behaviours). | **1** | 2 | 3 | 4 | 5 | 6 | 7 |
| 30 | When I'm feeling good, I don't have any useful ways to help myself keep feeling that way. | 1 | 2 | 3 | 4 | 5 | 6 | 7 |
| 31 | When I'm feeling good, I have trouble getting anything done. | 1 | 2 | 3 | 4 | 5 | 6 | 7 |
| 32 | When I'm feeling good, I must try to eliminate those feelings. | 1 | 2 | 3 | 4 | 5 | 6 | 7 |

**Supplementary Figure S1.** Graphical representations of all factor structures conducted in confirmatory factor analyses. PERCI, Perth Emotion Regulation Competency Inventory; N-Sub, Negative-Controlling experience; N-Inh, Negative-Inhibiting behavior; N-Act, Negative-Activating behavior; N-Tol, Negative-Tolerating emotions; P-Sub, Positive-Controlling experience; P-Inh, Positive-Inhibiting behavior; P-Act, Positive-Activating behavior; P-Tol, Positive-Tolerating emotions; ER, emotion regulation; G-Sub, controlling experience under both positive and negative emotions; G-Inh, inhibition of behaviors under both positive and negative emotions; G-Act, activation of behaviors under both positive and negative emotions; G-Tol, tolerations of both positive and negative emotions.
